# Supplementary material for: An HIV-1/HIV-2 Chimeric Envelope Glycoprotein Generates Binding and Neutralising Antibodies against HIV-1 and HIV-2 Isolates
Source: MDPI journal article supplement (doi:10.3390/ijms24109077), 2023-05-22
Supplement: s1 [file s1]

|           |             |             |            |            |            |            |            |            |       |
|-----------|-------------|-------------|------------|------------|------------|------------|------------|------------|-------|
| HIV1HXB2  | MRVKEKYQHL  | WRWGWRWGT   | MLGMLM--IC | SATEKLWVTV | YYGVPVWKEA | TTTLFCASDA | KAYDTEVHNV | WATHACVPTD | [80]  |
| HIV1TH023 | .RTQMTWPN.  | .K.-----T   | .I.LVI--.. | ..SDN..... | -.....RD.  | D-----..   | ..QE..A... | .....      | [80]  |
| HIV2ALI   | .SSRNQ----  | -----L      | .VTI.LASA. | LVYC.QY... | F....A-.N. | SIP....TKN | RD-----    | .G.IQ.L.-. | [80]  |
| HIV1HXB2  | PNPQEVVLVN  | VTENFNMWKN  | DMVEQMHEDI | ISLWDQSLKP | CVKLTPLCVS | LKCTDLKNDT | NTNSSSGRMI | ME-----    | [160] |
| HIV1TH023 | .....LH.E.  | .....       | -.....Q..V | .....      | .....T     | .N..NANVTN | VK.ITNVPN. | GNI-----   | [160] |
| HIV2ALI   | NDY..IA.-.  | ...A.DA.DT  | --.TEQA..V | WR.FET.I.. | .....-A    | M..SNISTES | T.SP.P.STL | KPIESDPCIK | [160] |
| HIV1HXB2  | -----KG     | EIKNCSEFNIS | TSIRGKVQKE | YAFFYKLDII | --PIDNDTTS | YK--LTSCNT | SVITQACPKV | SFEPIPIHYC | [240] |
| HIV1TH023 | -----TD     | .VR.....MT  | EL-.D.K..V | H.L.....V- | --.E.-SSK  | .R--.IN... | ...K.....I | ..D.....   | [240] |
| HIV2ALI   | ADNCPRGLDE  | .MV..R..MT  | GLQ.D.PKQY | NETW.SK.VV | CE.FNTT.NQ | TRCYMNH... | ....ES.D.H | YWDA.RFR.. | [240] |
| HIV1HXB2  | APAGFAILKC  | NNKTFNGTGP  | -CTNVSTVQC | THGIRPVVST | QLLLNGSLAE | EEVVIRSVNF | TDNAKTIIVQ | LNTSVEINCT | [320] |
| HIV1TH023 | T.-.Y.....  | .D.N.....   | -K.-.S...  | ....K.A... | .....      | ..II...E.L | .N.....H   | ..K.....   | [320] |
| HIV2ALI   | ..P.Y.L.R.  | .DTNYS.FA.  | N.SK.VAAT. | .RMMEMQT.. | WFGF..TR.. | NRTY.YWHG- | -RDNR...LN | KQYNLTMH.- | [320] |
| HIV1HXB2  | RPNNNTRKRI  | RIQRGPGRAF  | VTIGKI-GNM | RQAHCNISRA | KWNNTLKQIA | SKLREQ---- | --FGNNKTII | FKQSSGGDPE | [400] |
| HIV1TH023 | ..S....TS.  | N.--...QV.  | YRT.D.I.DI | .K.Y.E.NG. | ...EV..KVT | E..K.H---- | --.-----F  | ---PPS..L. | [400] |
| HIV2ALI   | K.G.K.VVP.  | TLMS.----L  | FHSQP.NKRP | ...W.WFKG- | E.REAMQEVK | ET.VKHPRYK | GTNDT.QINF | T.PGR.S.A. | [400] |
| HIV1HXB2  | IVTHSFNCGG  | EFFYCNSTQL  | FNSTWFNSTW | STEGSNNTG  | SDTITLPCRI | KQIINMWQKV | GKAMYAPPIS | GQIRCSSNIT | [480] |
| HIV1TH023 | .M-.H...R.  | ..-...T.R.  | ..N.-----  | ----CMEN.T | MCG.I...K. | .....RA    | .Q.....    | .R.N.V.... | [480] |
| HIV2ALI   | E.-YMW.T.R. | .L-...M.WF  | L.WV-----  | ----E.K.GQ | EQHNYA..H. | ...T.H..   | ..NV.L.R-E | .ELT.-NTV. | [480] |
| HIV1HXB2  | GLLLTRDGGN  | SNNESEIFRP  | GGGDMRDNR  | SELYKYKVVK | IEPLGVAPTK | AKRRVVQREK | RAVGIGALFL | GFLGAAGSTM | [560] |
| HIV1TH023 | .I.-.....-  | L..TN.T...  | ...NIK.... | .....Q     | .....I...R | .....E...  | .....MIF   | .....-...  | [560] |
| HIV2ALI   | S.IANI.---  | -TDQTIT.SA  | EVAEL---Y. | L..GD...-E | .T.I.F.TSE | RRYSSTP.N. | ---.VFV.L. | ...AT...MT | [560] |

|           |            |            |            |             |             |            |            |             |       |
|-----------|------------|------------|------------|-------------|-------------|------------|------------|-------------|-------|
| HIV1HXB2  | GAASMTLTVQ | ARQLLSGIVQ | QQNNLLRAIE | AQQHLLQLTV  | WGIKQLQARI  | LAVERYLKDQ | QLLGIWGCSG | KLICTTAVPW  | [640] |
| HIV1TH023 | ..--I..... | .....      | ..S.....   | .....       | .....V      | ....--Y... | -K..L....- | -K.I.....   | [640] |
| HIV2ALI   | A.--L..A-  | S.T..A.... | --Q..DMV-  | -K.QM.R...  | ...-N....V  | -TI.K..... | AR.NS...AF | RQV.H.T...- | [640] |
|           |            |            |            |             |             |            |            |             |       |
| HIV1HXB2  | NASWSNKSLE | QIWNHTTWME | WDREINNYTS | LIHSLIEESQ  | NQQEKNEQEL  | -LELDKWASL | WNWFNITNWL | WYIKLFIMIV  | [720] |
| HIV1TH023 | .ST...R.F. | E...NM..I. | .E...S...N | Q.YEILTQ..  | ...DR..KD.  | .....-     | ---D...-   | ....I....-  | [720] |
| HIV2ALI   | ---.V.N..K | PD.DNM..E. | --QQVRYLEA | N.SEQL.QA.  | I.....TY..  | K.SW.VFTN- | --.LDL.A-V | K..QYGVY.I  | [720] |
|           |            |            |            |             |             |            |            |             |       |
| HIV1HXB2  | GGLVGLRIVF | AVLSIVNRVR | QGYSPL---- | -SFQTHLPTP  | RGPDREPEGIE | EEGGERDRDR | SIRLVNGSLA | -LIWDDLRLS  | [800] |
| HIV1TH023 | ...I....I. | .....      | .....----  | -.L.--ITHH  | .E...-.R.-  | .....QG..K | .V...S.F.. | -.T.....    | [800] |
| HIV2ALI   | V.I.A....I | Y.-QMLS.L. | K..R.VFSSP | PGYIQQIHIIH | KDQE-----   | QT.T.DVDNV | GD..WPWPI. | Y.HFHL.ALI  | [800] |
|           |            |            |            |             |             |            |            |             |       |
| HIV1HXB2  | CLFSYHRLRD | LLLIVTRIVE | LLGR-----R | GWEALKYWWN  | LLQY---WSQ  | E---LKNSAV | SLLNA--TAI | AVAEGTDRVI  | [880] |
| HIV1TH023 | .....-..   | FIS.AA.T.. | ...HS-SKL. | ...G...LG.  | I.-.---.G.  | -----I..I  | -----      | ...-W.....  | [880] |
| HIV2ALI   | G.Y.IC.DLS | RFS.LQP.FQ | S.Q.ALTTI. | D.---RLKAA  | Y...GCE.I.  | .AFQFRIARE | T.T.TWRDLW | GAMQWVG.IL  | [880] |
|           |            |            |            |             |             |            |            |             |       |
| HIV1HXB2  | EVVQGACRAI | RHIPRRIRQG | LERILL     | [906]       |             |            |            |             |       |
| HIV1TH023 | ..A...W... | L...-..... | ...T..     | [906]       |             |            |            |             |       |
| HIV2ALI   | A-----     | --V.....   | A.IA..     | [906]       |             |            |            |             |       |

**Figure S2-** Alignment of the envelope sequences of HIV-1 HXB2 (subtype B), HIV-1 TH023 (CRF01\_AE) and HIV-2 ALI. Alignment was performed with Muscle using default parameters in MEGA X. The chimeric gp120 produced in this work was based on the TH023 and ALI strains. The HIV-2 ALI C2V3C3 fragment present in the chimera is shown in red letters.
