# Supplementary material for: An HIV-1/HIV-2 Chimeric Envelope Glycoprotein Generates Binding and Neutralising Antibodies against HIV-1 and HIV-2 Isolates
Source: MDPI journal article supplement (doi:10.3390/ijms24109077), 2023-05-22
Supplement: s1 [file s1]

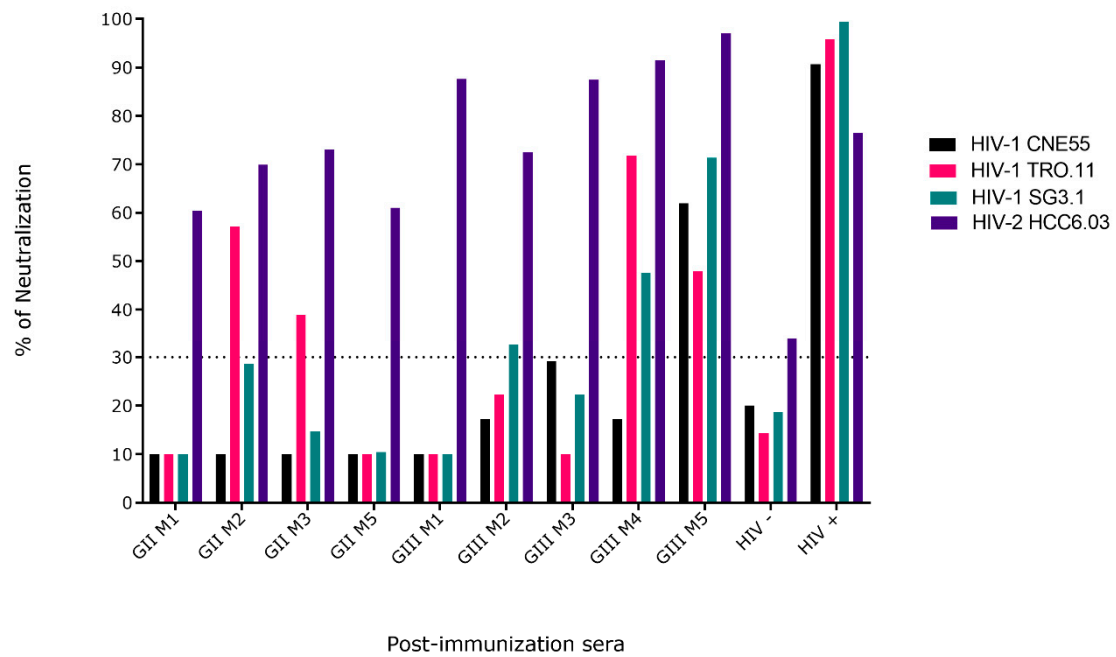

**Figure S1-** Neutralising activity of sera collected after the fourth boost as assessed by the percentage of neutralisation of Tier 1 (HIV-1SG3.1) and Tier 2 (HIV-1CNE55; HIV-1 TRO.11; HIV-2 HCC06.03) isolates. GII- group II mice; GIII- group III mice. HIV-, HIV-1 seronegative serum (negative control); HIV+, HIV-1 seropositive serum (positive control).
